# Supplementary material for: Twitchin kinase inhibits muscle activity
Source: PubMed Central journal article supplement — Mol Biol Cell. 2017 Jun 15;28(12):1591–600. doi: 10.1091/mbc.E16-10-0707 (PMC5469603; doi:10.1091/mbc.e16-10-0707), 2017-06-15
Supplement: supp_E16-10-0707v1_CombinedSupMats.pdf [file supp_E16-10-0707v1_CombinedSupMats.pdf]

# Supplemental Materials

*Molecular Biology of the Cell*

Matsunaga et al.

## Supplemental Information

Supplemental Fig. 1

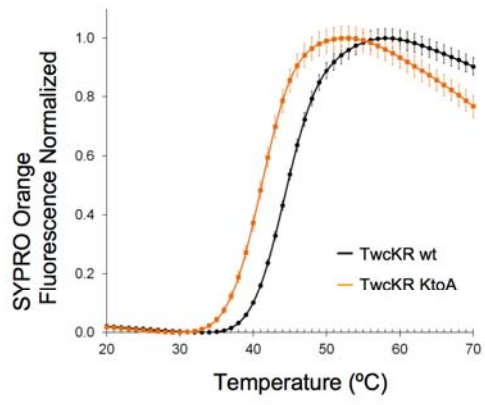

**Figure S1. Thermal denaturation of TwcKR wt (black) and TwcKR KtoA (orange) was measured by DSF. Error bars show standard deviation of triplicate measurements collected for each temperature interval.**

## Supplemental Fig. 2

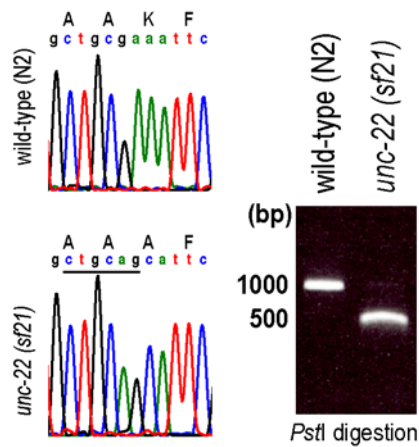

**Figure S2. Generation of *unc-22(sf21)* nematodes by CRISPR/Cas9.**

On the right is an agarose gel showing PCR fragments digested with *PstI* that permits discrimination of wild-type from the *unc-22(sf21)* sequence. On the left are portions of the DNA sequence chromatograms of these fragments together with conceptual translation; the underline denotes the *PstI* recognition site.

### Supplemental Fig. 3

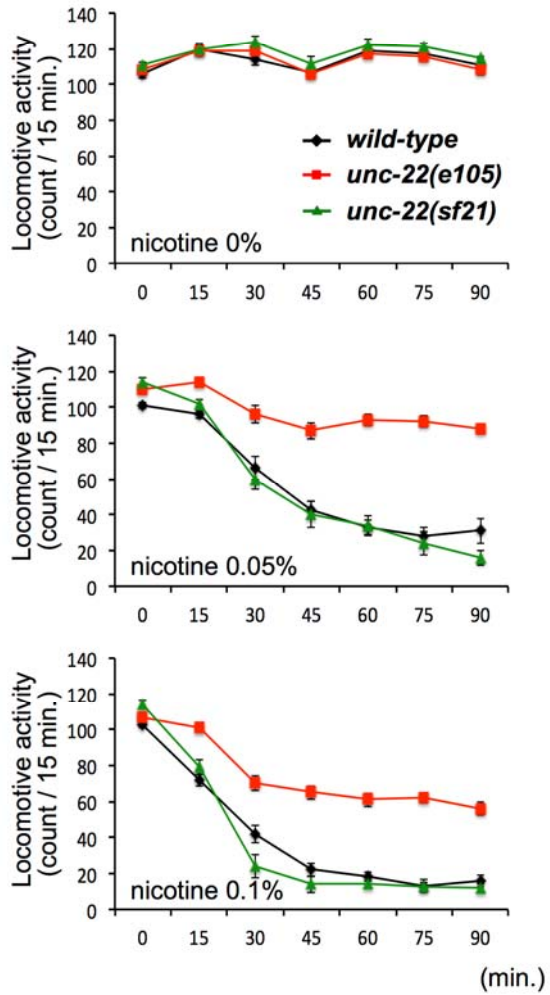

**Figure S3. Response of wild-type, *unc-22(e105)* and *unc-22(sf21)* nematodes to nicotine.**

A WMicrotracker (DesignPlus) was used to monitor the locomotion of multiple worms per well in a microtiter dish over time during exposure to a solution of 0.00%, 0.05% or 0.1% nicotine.

## Supplemental Fig. 4

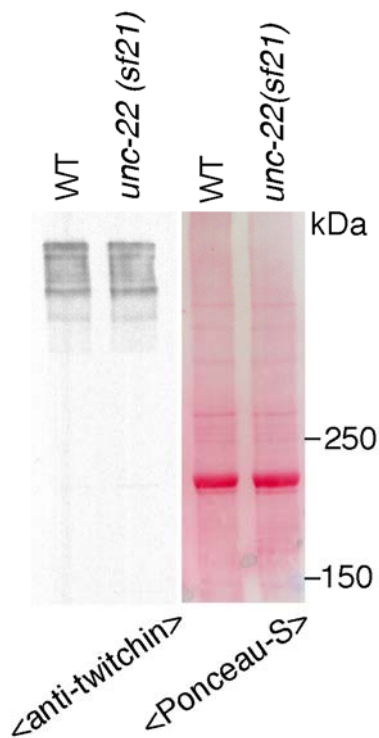

**Figure S4. By western blot, the *unc-22(sf21)* mutant expresses normal levels of twitchin isoforms of the appropriate size.**

Extracts from wild-type (WT) or *unc-22(sf21)* mutant animals were separated on a 5% SDS-PAGE and transferred to a membrane. On the right is shown the blot after Ponceau-

S staining; the positions of molecular weight markers are indicated. On the left is shown the result of reaction to anti-twitchin antibodies.

## Supplemental Fig.5

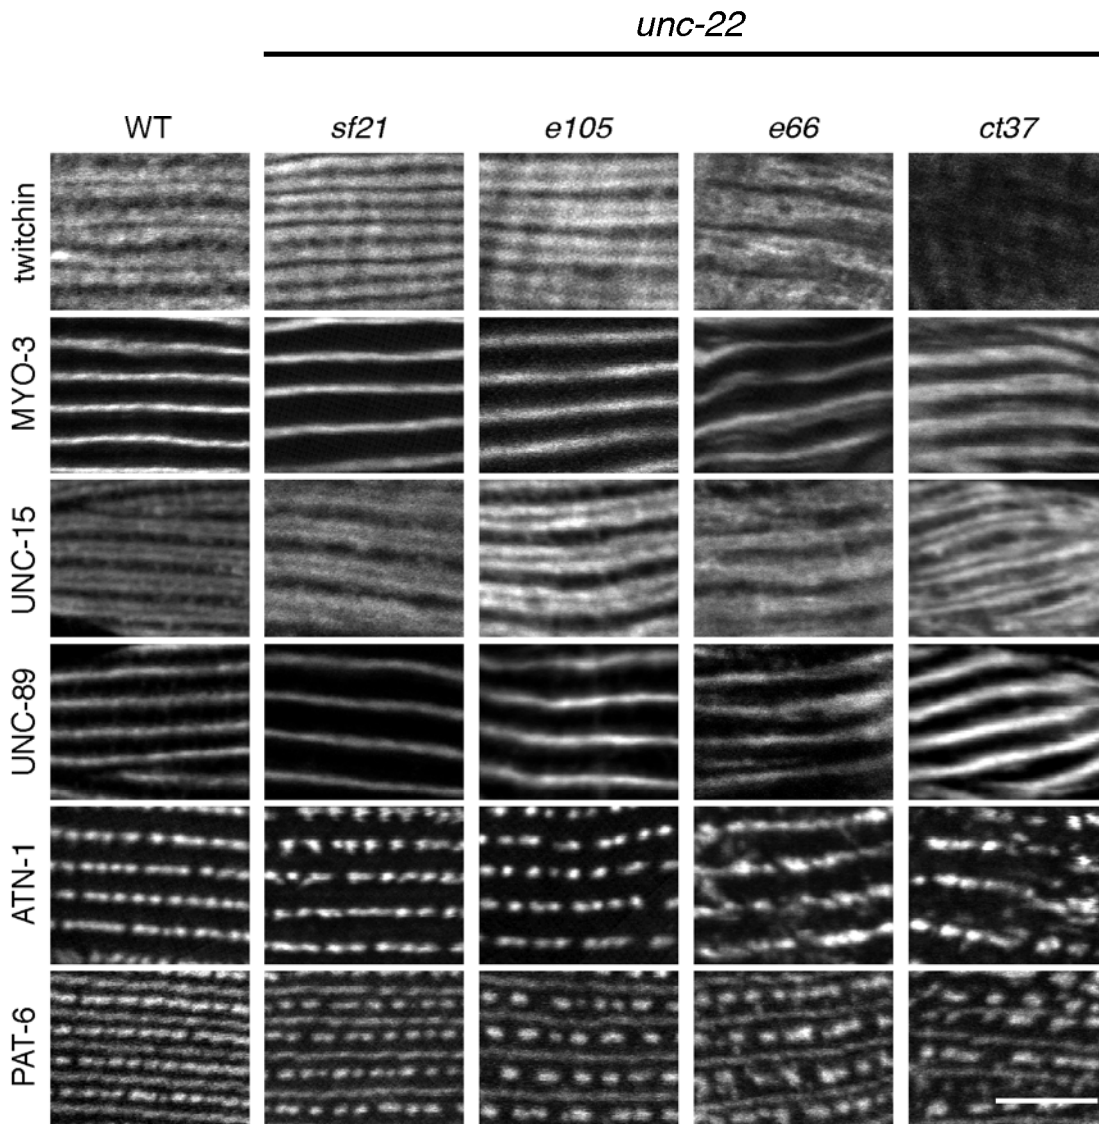

**Figure S5. Comparison of sarcomeric structure of wild-type and *unc-22* mutant nematodes assessed by immunofluorescent staining.**

Wild-type (WT) and the indicated *unc-22* mutant nematodes were fixed and immunostained with antibodies to the indicated sarcomeric proteins: twitchin, MYO-3 (myosin heavy chain A) and UNC-15 (paramyosin) of the A-bands; UNC-89 (obscurin) of the M-lines; ATN-1 ( $\alpha$ -actinin) of dense bodies (Z-disk analogs); and PAT-6 ( $\alpha$ -parvin) of M-lines and dense bodies. As indicated, *unc-22(sf21)* shows normal localization of every sarcomeric protein tested, including twitchin. For comparison, *unc-22(e105)* shows the same normal localization pattern as *unc-22(sf21)*, but the loss of function allele *unc-22(e66)* and the null allele *unc-22(ct37)* show disorganization of each of these marker proteins. Scale bar, 10  $\mu$ m.

# Supplemental Fig. 6

twitchin kinase domain

Gly-rich loop

ATP-binding residue (K)

|                             | 1                                                                              | 50 |
|-----------------------------|--------------------------------------------------------------------------------|----|
| <i>C.elegans</i>            | EIKHHDHVLVDHYDIHEELG <sup>5</sup> TGAFGVVHRVTERATGNNFAAKFVMTPHESDK             |    |
| <i>C.remanei</i>            | EIKHHDHVLVDHYDIHEELG <sup>5</sup> TGAFGVVHRVTERATGNNFAAKFVMTPHESDK             |    |
| <i>C.briggsae</i>           | EIKHHDHVLVDHYDIHEELG <sup>5</sup> TGAFGVVHRVTERATGNNFAAKFVMTPHESDK             |    |
| <i>C.tropicalis</i>         | EIKHHDHVLVDHYDIHEELG <sup>5</sup> TGAFGVVHRVTERATGNNFAAKFVMTPHESDK             |    |
| <i>C.sinica</i>             | EIKHHDHVLVDHYDIHEELG <sup>5</sup> TGAFGVVHRVTERATGNNFAAKFVMTPHESDK             |    |
| <i>C.japonica</i>           | EIKHHDHVLVDHYDIHEEIG <sup>5</sup> TGAFGVVHRVTERATGNNFAAKFVMTPHESDK             |    |
| <i>H.bacteriophora</i>      | EIKHDSVLDHYDIHEEIG <sup>5</sup> TGAFGVVHRCTERATGNTFAAKFVNTPHESDK               |    |
| <i>S.vulgaris</i>           | EIKHDSVLDHYDIHEEIG <sup>5</sup> TGAFGVVHRCTERATGNNFAAKFVNTPHESDK               |    |
| <i>A.duodenale</i>          | EIKHDSVLDYDIHEEIG <sup>5</sup> TGAFGVVHRCTERATGNTFAAKFVNTPHESDK                |    |
| <i>O.dentatum</i>           | EIKHDSVLDHYDIHEEIG <sup>5</sup> TGAFGVVHRCTERATGNTFAAKFINTPHESDK               |    |
| <i>H.polygyrus</i>          | EIKHSPVLDYDIHEEIG <sup>5</sup> TGAFGVVHRCTERATGNTFAAKFVNTPHESDK                |    |
| <i>A.ceylanicum</i>         | EIKHDSVLDYDIHEEIG <sup>5</sup> TGAFGVVHRCTERATGNTFAAKFVNTPHESDK                |    |
| <i>A.caninum</i>            | EIKHDSVLDYDIHEEIG <sup>5</sup> TGAFGVVHRCTERATGNTFAAKFVNTPHESDK                |    |
| <i>T.circumcincta</i>       | EIKHTPVLDQYDIHEEIG <sup>5</sup> TGAFGVVHRCTERATGNTFAAKFVNTQNEADK               |    |
| <i>T.canis</i>              | EPKRDSVYDYYDILEEIG <sup>5</sup> QAGFVVHRCVERATGNTFAAKFVNTPHESDK                |    |
| <i>H.contortus</i>          | EIKHTPVLDQYDIHEEIG <sup>5</sup> TGAFGVVHRCTERATGNTFAAKFVNTQNEADK               |    |
| <i>H.placei</i>             | EIKHTPVLDQYDIHEEIG <sup>5</sup> TGAFGVVHRCTERATGNTFAAKFVNTQNEADK               |    |
| <i>A.cantonensis</i>        | EIRHNSVLDNYDIHEEIG <sup>5</sup> TGAFGVVHRCTERATGNTFAAKFVNTPHESDK               |    |
| <i>S.feltiae</i>            | ETKRESVYDYYDILEEIG <sup>5</sup> SGAFGVVHRCVERATGNTFAAKFVNTPHESDK               |    |
| <i>S.glaseri</i>            | ETKRESVYDYYDILEEIG <sup>5</sup> SGAFGVVHRCVERATGNTFAAKFVNTPHESDK               |    |
| <i>S.scapterisci</i>        | ETKRESVYDYYDVLEEIG <sup>5</sup> SGAFGVVHRCVERATGNTFAAKFVNTPHESDK               |    |
| <i>S.monticolum</i>         | ETKRESVYDYYVMEEIG <sup>5</sup> SGAFGVVHRCVERATGNTFAAKFVNTPHESDK                |    |
| <i>S.muris</i>              | EPKKASVYDLYDVYEEIG <sup>5</sup> VGAFGVVHRCVERATGNTFAAKFVNTPHESDK               |    |
| <i>A.simplex</i>            | EPKRDSVYDYYDILEEIG <sup>5</sup> EGAFGVVHRCVERATGNTFAAKFVNTPHSADK               |    |
| <i>S.carpocapsae</i>        | DTKRESVYDYYDVLEEIG <sup>5</sup> SGAFGVVHRCVERATGNTFAAKFVNTPHESDK               |    |
| <i>A.suum</i>               | EPKRDSVYDYYDILEEIG <sup>5</sup> QAGFVVHRCVERATGNTFAAKFVNTPHDADK                |    |
| <i>A.lumbricoides</i>       | EPKRDSVYDYYDILEEIG <sup>5</sup> QAGFVVHRCVERATGNTFAAKFVNTPHDADK                |    |
| <i>D.viviparus</i>          | EIKHNSVLDNYDIHEEIG <sup>5</sup> SGAFGVVHRCTERATGNTFAAKFVNTPHQADK               |    |
| <i>P.redivivus</i>          | EIKHESAYDYYDILEEIG <sup>5</sup> TGAFGVVHRCVERATGNTFAAKFVNTTPSTAEK              |    |
| <i>T.callipaeda</i>         | EPKRESVYDYYDILEEIG <sup>5</sup> SGAFGVVHRCVERATGNTFAAKFVNTPHNVDK               |    |
| <i>A.viteae</i>             | EPKRESVYNHYDILEEIG <sup>5</sup> SGAFGSVHRCVERATGNTFAAKFVNTPHDADK               |    |
| <i>O.ochengi</i>            | EPKRESVYNHYDILEEIG <sup>5</sup> SGAFGSVHRCVERATGNTFAAKFVNTPHDMDK               |    |
| <i>O.volvulus</i>           | EPKRESVYNHYDILEEIG <sup>5</sup> SGAFGSVHRCVERATGNTFAAKFVNTPHDMDK               |    |
| <i>P.trichosuri</i>         | EIKHDSIYDYYDILEEIG <sup>5</sup> TGAFGVVHRCVERATGNTFAAKFVNTVSNSEK               |    |
| <i>L.sigmodontis</i>        | EPKREPVDYDHYDILEEIG <sup>5</sup> SGAFGSVHRCVEKATGNTFAAKFVNTPHHADK              |    |
| <i>O.flexuosa</i>           | EPKRESVYNHYDILEEIG <sup>5</sup> SGAFGSVHRCVERATGNTFAAKFVNTPHDLDK               |    |
| <i>W.bancrofti</i>          | EPKRESVYDYYDILEEIG <sup>5</sup> SGAFGSVHRCVERATGNTFAAKFVNTPHDADK               |    |
| <i>B.malayi</i>             | EPKRESVYDYYDILEEIG <sup>5</sup> SGAFGSVHRCVERATGNTFAAKFVNTPHDADK               |    |
| <i>S.ratti</i>              | EIKHDSIYDYYDVLEEIG <sup>5</sup> TGAFGVVHRCVEKATGNTFAAKFVNTVSDNEK               |    |
| <i>S.venezuelensis</i>      | EIKHDSIYDYYDVLEEIG <sup>5</sup> TGAFGVVHRCVEKGTGNTFAAKFVNTVSDNEK               |    |
| <i>S.stercoralis</i>        | EIKHDSIYDYYDVLEEIG <sup>5</sup> TGAFGVVHRCVERATGNTFAAKFVNTVSDNEK               |    |
| <i>B.pahangi</i>            | EPKRESVYDYYDILEEIG <sup>5</sup> SGAFGSVHRCVERATGNTFAAKFVNTPHDADK               |    |
| <i>L.loa</i>                | EPKRESVYDYYDILEEIG <sup>5</sup> SGAFGSVHRCVERATGNTFAAKFVNTPHDADK               |    |
| <i>D.immitis</i>            | ELKRESVYNYYDILEEIG <sup>5</sup> SGAFGSVHRCIEKATGNTFAAKFVNTPHDADK               |    |
| <i>S.papillosus</i>         | EIKHDSIYDYYDVLEEIG <sup>5</sup> NGAFGVVHRCVEKGTGNTFAAKFVNTVSDNEK               |    |
| <i>D.medinensis</i>         | ETKRESIYDYYDILEEIG <sup>5</sup> TGAFGVVHRCVERSTGR <sup>5</sup> TFAAKFVNTPNDSDK |    |
| <i>Rhabditophanes (sp.)</i> | DIKHESVYEKYDILEEIG <sup>5</sup> VGAFGVVHRCVEKATGNTFAAKFVNTVSDNEK               |    |



$\alpha$ HC (E)

51

100

*C.elegans* ETVRKEIQTMSVLRHPTLVNLHDAFEDDNEMVMIYEFMSGGELFEKVADE  
*C.remanei* ETVRKEIQTMSVLRHPKLVNLHDAFEDDNEMVMIYEFMSGGELFEKVADE  
*C.briggsae* ETVRKEIQTMSVLRHPTLVNLHDAFEDDNEMVMIYEFMSGGELFEKVADE  
*C.tropicalis* ETVRKEIHTMSALRHPKLVNLHDAFEDDNEMVMIYEFMSGGELFEKVADE  
*C.sinica* ETVRKEIQTMSALRHQKLVNLHDAFEDDNEMVMIYEFMSGGELFEKVADE  
*C.japonica* DTVRKEINTMSVLRHPKLVNLHDAFEDDNEMVMVYEFMSGGELFEKVADE  
*H.bacteriophora* DTVRKEINTMSILRHPTLINLHDAFEDDKEMVMIYEFMSGGELFEKVADD  
*S.vulgaris* ATVRKEINTMSVLRHPTLINLHDAFEDDKEMVMIYEFMSGGELFEKVADD  
*A.duodenale* ATVRKEINTMSVLRHPTLINLHDAFEDDKEMVMIYEFMSGGELFEKVADD  
*O.dentatum* QTVRKEINTMSVLRHPTLINLHDAFEEDKEMVMIYEFMSGGELFEKVADD  
*H.polygyrus* ETVRKEINTMSVLRHPTLINLHDAFEDDKEMVMIYEFMSGGELFEKVADD  
*A.ceyanicum* ATVRKEINTMSVLRHPTLINLHDAFEDDKEMVMIYEFMSGGELFEKVADD  
*A.caninum* ATVRKEINTMSVLRHPTLINLHDAFEDDKEMVMIYEFMSGGELFEKVADD  
*T.circumcincta* ATVRKEINTMSVLRHPTLINLHDAFEGDKEMVMIYEFMSGGELFEKVADD  
*T.canis* DTVRKEIQTMSNLRHPKLVNLHDAFEDDNEMVMIYEFMSGGELFEKVADE  
*H.contortus* ATVRKEINTMSVLRHPKLVNLHDAFEGDKEMVMIYEFMSGGELFEKVADD  
*H.placei* ATVRKEINTMSVLRHPKLVNLHDAFEGDKEMVMIYEFMSGGELFEKVADD  
*A.cantonensis* ETVRKEISTMSTLRHPTLINLHDAFEDDKEMVMIYEFMSGGELLEKIADD  
*S.feltiae* DTVRKEIQTMSSELRHPKLVNLHDAFEDEDEMVMVYEFMSGGELFEKVSDE  
*S.glaseri* ETVRKEINTMSSELRHPKLVNLHDAFEDEDEMVMVYEFMSGGELFEKVSDE  
*S.scapterisci* ETVRKEIHTMSELRHPKLVNLHDAFEDEDEMVMVYEFMSGGELFEKVSDE  
*S.monticolum* ETVRKEINTMSSELRHPKLVNLHDAFEDEDEMVMVYEFMSGGELFEKVSDE  
*S.muris* ETVRKEINTMSSLRHPKLVNLHDAFEDDQEMVLIYEFMSGGELFEKIAND  
*A.simplex* ETVRKEIQTMSNVRHPKLVNLHDAFEDDNEMVMIYEFMSGGELFEKVADE  
*S.carpocapsae* ETVRKEIHTMSELRHPKLVNLHDAFEDDDDEMVMVYEFMSGGELFEKVSDE  
*A.suum* NTVRKEIQTMSNLRHPKLVNLHDAFEDDNEIVMIYEFMSGGELFEKVADE  
*A.lumbricoides* NTVRKEIQTMSNLRHPKLVNLHDAFEDDNEIVMIYEFMSGGELFEKVADE  
*D.viviparus* ETVRKEINTMSVLRHPTLINLHDAFEDDKEMVMIYEFMSGGELFEKVADD  
*P.redivivus* ETVRKEINTMSELRHPKLVNLHDAFEDEHEMVMVYEFMSGGELFEKVSDE  
*T.callipaeda* DTVRKEISTMSILRHPKLVNLHDAFEDDQEMVMIYEFMSGGELFEKVSDE  
*A.viteae* DTVRKEINTMSVLRHPKLVNLHDAFEDDKEMVMIYEFMSGGELFEKVSDE  
*O.ochengi* DTVRKEINTMSVLRHPKLVNLHDAFEDDKEMVMIYEFMSGGELFEKISDE  
*O.volvulus* DTVRKEINTMSVLRHPKLVNLHDAFEDDKEMVMIYEFMSGGELFEKISDE  
*P.trichosuri* DTVRKEIHTMSELRHPKLVNLHDAFEDENQMAMVYEFMSGGELFEKVADD  
*L.sigmodontis* DTVRKEINTMSVLRNPKLVNLHDAFEDDKEMVMIYEFMSGGELFEKVSDE  
*O.flexuosa* DTVRKEINTMSVLRHPKLVNLHDAFEDDKEMIMVYEFMSGGELFEKISDE  
*W.bancrofti* DTVRKEINTMSVLRHPKLVNLHDAFEDDKIVMVYEFMSGGELFEKISDE  
*B.malayi* DTVRKEINTMSVLRHPKLVNLHDAFEDDKEMVMVYEFMSGGELFEKISDE  
*S.ratti* DTVRKEIQVMSELRHPKLVNLHDAFEDENQMAMVYEFMSGGELFEKVADD  
*S.venezuelensis* DTVRKEIHVMSELRHPKLVNLHDAFEDENQMAMVYEFMSGGELFEKVADD  
*S.stercoralis* DTVTKEIQVMSELRHPKLVNLHDAFEDENQMAMVYEFMSGGELFEKVADD  
*B.pahangi* DTVRKEINTMSVLRHPKLVNLHDAFEDDKEMIMVHEFMSGGELFEKISDE  
*L.loa* DTVCKEINTMSVLRHPKLVNLHDAFEDDKEMVMIYEFMSGGELFEKISDE  
*D.immitis* DTVRKEISNMSVLRHPKLVNLHDAFEDDKEMVMVYEFMSGGELFEKISDE  
*S.papillosus* DTVRKEIHVMSELRHPKLVNLHDAFEDENQMAMVYEFMSGGELFEKVADD  
*D.medinensis* STVRKEINTMSALRNPKLVNLHDAFEEDQAMIMVYEFMSGGELFEKVSDI  
*Rhabditophanes (sp.)* ETVRKEINTMSELRHPKLVNLHDAFEDETOQVMVYEFMSGGELFEKVSDD

Proton  
acceptorATP/Mg<sup>2+</sup>  
(N)

101

150

*C. elegans* HNKMSSEDEAVEYMRQVCKGLCHMHENNYVHL<sup>6</sup>DLKPENIMFTTKRSNELKL  
*C. remanei* HNKMSSEDEAVEYMRQVCKALCHMHENNYVHLDLKPENIMFTTKRSNELKL  
*C. briggsae* HNRMSSEDEAVEYMRQVCKALCHMHENNYVHLDLKPENIMFTTKRSNELKL  
*C. tropicalis* HNKMSSEDEAVDYMRQVCKALCHMHENNYVHLDLKPENIMFTTKRSNELKL  
*C. sinica* HNRMSSEDEAVEYMRQICKGLCHMHENNYVHLDLKPENIMFTTKRSNELKL  
*C. japonica* HNKMSSEDEAVEYMRQVCKALCHMHENNYVHLDLKPENIMFTTKRSNELKL  
*H. bacteriophora* SNKMSELEAIEYTRQVCKALCHMHENNYVHLDLKPENIMFTTKKSKQLKL  
*S. vulgaris* TNRMTEAEAIDYTRQVCNALCHMHENNYVHLDLKPENIMFTTKKSNQLKL  
*A. duodenale* SNRMTEAEAIDYVRQVCKALCHMHENNYVHLDLKPENIMFTTKKSNQLKL  
*O. dentatum* SNRMTEAEAIDYTRQVCKALCHMHENNYVHLDLKPENIMFTTKKSNQLKL  
*H. polygyrus* SNRMTEAEAIEYTRQVCKALCHMHENNYVHLDLKPENIMFTTKKSNELKL  
*A. ceylanicum* SNRMTEAEAIDYVRQVCKALCHMHENNYVHLDLKPENIMFTTKKSNQLKL  
*A. caninum* SNRMTEAEAIDYVRQVCKALCHMHENNYVHLDLKPENIMFTTKKSNQLKL  
*T. circumcincta* SNRMTEAEAIEYTRQVCKALCHMHENNYVHLDLKPENIMFTTKKSNELKL  
*T. canis* KNRMSEAEAVEYMRQVCEALRHMHEMNYVHLDLKPENIMFTTKKSNQLKL  
*H. contortus* SNRMTEAEAIEYTRQVCKALCHMHENNYVHLDLKPENIMFTTKKSNELKL  
*H. placei* SNRMTEAEAIEYTRQVCKALCHMHENNYVHLDLKPENIMFTTKKSNELKL  
*A. cantonensis* SNRMTEAEAIDYIRQVCKALCHMHENNYVHLDLKPENIMFTTKKSNQLKL  
*S. feltiae* KNKMSEEEAIDYMRQVCSALKHMHEMNYVHLDLKPENIMFTTKKSNQLKL  
*S. glaseri* KNRMSEEEAIDYMRQVCDALRHMHEMNYVHLDLKPENIMFTTKKSNQLKL  
*S. scapterisci* KNRMSEEEAIDYMRQVCDALRHMHEMNYVHLDLKPENIMFTTKKSNQLKL  
*S. monticolum* KNKMSEEEAIDYMRQVCGALKHMHEMNYVHLDLKPENIMFTTKKSNQLKL  
*S. muris* DSRMSEAEAIEYMRQICDGLRHMHEMNYVHLDLKPENIMFTTKKSNQLKL  
*A. simplex* KNKMSETDAVDYMRQICNALRHLHEMSYVHLDLKPENIMFTTKKSNQLKL  
*S. carpocapsae* KNRMSEEEAIDYMRQVCNALRHMHEMNYVHLDLKPENIMFTTKKSNQLKL  
*A. suum* KNRMSEAEAVDYMRQVCDALRHMHEMNYVHLDLKPENIMFTTKKSNQLKL  
*A. lumbricoides* KNRMSEAEAVDYMRQVCDALRHMHEMNYVHLDLKPENIMFTTKKSNQLKL  
*D. viviparus* SNRMTEAEVTDYIRQICKALCHMHENNYVHLDLKPENIMFTTKKSNQLKL  
*P. redivivus* KNRMSEDEA INYMRQVCEALKHMHEKNYVHLDLKPENIMFTTRSDQLKL  
*T. callipaeda* KNRMSEAEAVDYIRQVCEALRHMHEMNYVHLDLKPENIMFTAkkSDRLKL  
*A. viteae* RNRMSETDAVGYIRQVCEALCHMHENNYVHLDLKPENIMFITKKSdQLKL  
*O. ochengi* KNRMSETDAIDYIRQVCEALCHMHENNYVHLDLKPENIMFMTKKSdQLKL  
*O. volvulus* KNRMSETDAIDYIRQVCEALCHMHENNYVHLDLKPENIMFMTKKSdQLKL  
*P. trichosuri* KNKMNEDEAMNYMKQICVALKHMHENNFVHLDLKPENIMFTTRKSSQLKL  
*L. sigmodontis* KNRMSETDAIGYIRQVCEALCHMHENNYVHLDLKPENIMFMTKKSdQLKL  
*O. flexuosa* KNRMSETDAIDYIRQVCEALCHMHENNYVHLDLKPENIMFMTKKSdQLKL  
*W. bancrofti* KNRMSEMDAVGYIRQVCEALCHMHENNYVHLDLKPENIMFITKKSdQLKL  
*B. malayi* RNRMSEMDAVGYIRQICEALCHMHENNYVHLDLKPENIMFITKKSdQLKL  
*S. ratti* KNKMTEEEAKNYMKQICIGLRHMHENNFVHLDLKPENIMFTTKKSSQLKL  
*S. venezuelensis* KNRMTEDEAKNYMKQICNALKHMHENNFVHLDLKPENIMFTTKKSSQLKL  
*S. stercoralis* KNKMTEEEAKNYMKQICVALRHMHENNFVHLDLKPENIMFTTKKSSQLKL  
*B. pahangi* KNRMSEMDAVGYIRQICEALCHMHENNYVHLDLKPENIMFITKKSdQLKL  
*L. loa* KNRMSETDTIGYIRQVCEALRHMHEMNYVHLDLKPENIMFMTKKSdQLKL  
*D. immitis* KSRMSETNAVGYIRQVCEALRHMHEMNYVHLDLKPENIMFITKKSdQLKL  
*S. papillosus* KNRMTEDEARNYMKQICNALKHMHENNFVHLDLKPENIMFTTKKSSQLKL  
*D. medinensis* NNHMSEKEAIEYMRQVCEGLRHMHEMNYVHLDLKPENIMFTTKTSNQLKL  
*Rhabditophanes (sp.)* KNKMSEDEAKDYMKQICVGLKHMHEQNYVHLDLKPENIMFTTRKSSSLKL

|                             |                                                    |
|-----------------------------|----------------------------------------------------|
| <i>C.elegans</i>            | IDFGLTAHLDPKQSVKVTGTAEFAAPEVAEGKPVGYTDMWSVGVLSYI   |
| <i>C.remanei</i>            | IDFGLTAHLDPKQSVKVTGTAEFAAPEVAEGKPVGYTDMWSVGVLSYI   |
| <i>C.briggsae</i>           | IDFGLTAHLDPKQSVKVTGTAEFAAPEVAEGKPVGYTDMWSVGVLSYI   |
| <i>C.tropicalis</i>         | IDFGLTAHLDSKQSVKVTGTAEFAAPEVAEGKPVGYTDMWSVGVLSYI   |
| <i>C.sinica</i>             | IDFGLTAHLDPKQSVKVTGTAEFAAPEVAEGKPVGYTDMWSVGVLSYI   |
| <i>C.japonica</i>           | IDFGLAAHLDPKQSVKVTGTAEFAAPEVAEGKPVGYTDMWSVGVLSYI   |
| <i>H.bacteriophora</i>      | IDFGLTSHLDPKQSVKVTGTAEFAAPEVANGNPVGYFTDMWSVGVLAYI  |
| <i>S.vulgaris</i>           | IDFGLASFLDPKESVKVTGTAEFAAPEVANGDPVGYTDMWSVGVLAYI   |
| <i>A.duodenale</i>          | IDFGLASYLDPKQSVKVTGTAEFAAPEVANGDPVGYTDMWSVGVLAYI   |
| <i>O.dentatum</i>           | IDFGLASYLDPKESVKVTGTAEFAAPEVANGDAVGYTDMWSVGVLAYI   |
| <i>H.polygyrus</i>          | IDFGLASYLDPKDSVKVTGTAEFAAPEVANGEPVGYFTDMWSVGVLAYI  |
| <i>A.ceylanicum</i>         | IDFGLASYLDPKQSVKVTGTAEFAAPEVANGDPVGYTDMWSVGVLAYI   |
| <i>A.caninum</i>            | IDFGLASYLDPKQSVKVTGTAEFAAPEVANGDPVGYTDMWSVGVLAYI   |
| <i>T.circumcincta</i>       | IDFGLASYLDPKESVKVTGTAEFAAPEVANGEPVGYFTDMWSVGVLSYI  |
| <i>T.canis</i>              | IDFGLAAKLDPKETVKVTGTAEFAAPEVAASKPVGFYTMWSVGVLAYI   |
| <i>H.contortus</i>          | IDFGLASYLDPKESVKVTGTAEFAAPEVANGEPVGYTDMWSVGVLAYI   |
| <i>H.placei</i>             | IDFGLASYLDPKESVKVTGTAEFAAPEVANGEPVGYTDMWSVGVLAYI   |
| <i>A.cantonensis</i>        | IDFGLTSYLNPKESIKVTGTAEFAAPEVAKGEPVGYTDMWSVGVLAYI   |
| <i>S.feltiae</i>            | IDFGLTAKLDPKQSVKVTGTAEFAAPEIALGKPVGFYTMWSVGVLSYI   |
| <i>S.glaseri</i>            | IDFGLTAKLDPKQSVKVTGTAEFAAPEVASGKPVGFYTMWSVGVLSYI   |
| <i>S.scapterisci</i>        | IDFGLTAKLDPKQSVKVTGTAEFAAPEIALGKPVGFYTMWSVGVLSYI   |
| <i>S.monticolum</i>         | IDFGLTAKLDPKQSVKVTGTAEFAAPEIALGKPVGFYTMWSVGVLSYI   |
| <i>S.muris</i>              | IDFGLTAKLDPKETVKVTGTAEFAAPEVALGKPVGFYTMWSVGVLTYYI  |
| <i>A.simplex</i>            | IDFGLAAKLDPKQSVKVTGTAEFAAPEVASNEPVGFYTMWSVGVLAYI   |
| <i>S.carpocapsae</i>        | IDFGLTAKLDPKQSVKVTGTAEFAAPEIALGKPVGFYTMWSVGVLSYI   |
| <i>A.suum</i>               | IDFGLAAKLDPKETVKVTGTAEFAAPEVAASKPVGFYTMWSVGVLAYI   |
| <i>A.lumbricoides</i>       | IDFGLAAKLDPKETVKVTGTAEFAAPEVAASKPVGFYTMWSVGVLAYI   |
| <i>D.viviparus</i>          | IDFGLTSYLNPKDSVKVTGTAEFAAPEVVKGEPVGYTDMWSVGVLTYYI  |
| <i>P.redivivus</i>          | IDFGLAAKLNPDAVKVTGTAEFAAPEVALGNPVGYTDMWSVGVLSYI    |
| <i>T.callipaeda</i>         | IDFGLTAKLDPKDIVKVTGTAEFAAPEVVNNKAVGFYTMWSVGVILAYI  |
| <i>A.viteae</i>             | IDFGLAAKLDPKETVKVTGTAEFAAPEVVASEPVGFYTMWSVGVLTYYI  |
| <i>O.ochengi</i>            | IDFGLAAKLDPKETVKVTGTAEFAAPEVVANEPVGFYTMWSVGVLAYI   |
| <i>O.volvulus</i>           | IDFGLAAKLDPKETVKVTGTAEFAAPEVVANEPVGFYTMWSVGVLAYI   |
| <i>P.trichosuri</i>         | IDFGLTAKLDPKNPVKVTGTAEFAAPEIASGNPVGYFTDMWSVGVLSYI  |
| <i>L.sigmodontis</i>        | IDFGLAAKLDPKQTVKVTGTAEFAAPEVVASEPVGFYTMWSVGVLTYYI  |
| <i>O.flexuosa</i>           | IDFGLAAKLDPKETVKVITGTAEFAAPEVVANEPVGFYTMWSIGVLTYYI |
| <i>W.bancrofti</i>          | IDFGLASKLDPKDTVKVTGTAEFAAPEVVANEPVGYTDMWSVGVLAYI   |
| <i>B.malayi</i>             | IDFGLAAKLDPKQTVKVTGTAEFAAPEVVANEPVGYTDMWSVGVLAYI   |
| <i>S.ratti</i>              | IDFGLTAKLDPKNPVKVTGTAEFAAPEIASGNPVGYFTDMWSVGVLSYI  |
| <i>S.venezuelensis</i>      | IDFGLTAKLDPKNPVKVTGTAEFAAPEIASGNPVGYFTDMWSVGVLSYI  |
| <i>S.stercoralis</i>        | IDFGLTSKLDKPNPVKVTGTAEFAAPEIASGNPVGYFTDMWSVGVLAYI  |
| <i>B.pahangi</i>            | IDFGLAAKLDPKQTVKVTGTAEFAAPEVVANEPVGYTDMWSVGVLAYI   |
| <i>L.loa</i>                | IDFGLAAKLDPKDTVKVTGTAEFAAPEVVANEPVGFYTMWSIGVLAYI   |
| <i>D.immitis</i>            | IDFGLAAKLNPKDTVKVTGTAEFAAPEVVTGEPVGFYTMWSVGVLAYI   |
| <i>S.papillosus</i>         | IDFGLTAKLDPKNPVKVTGTAEFAAPEIASGNPVGYFTDMWSVGVLSYI  |
| <i>D.medinensis</i>         | IDFGLTAKLDPKQIVKVTGTAEFAAPEVASNQPIGFYTMWSVGVLTYYI  |
| <i>Rhabditophanes (sp.)</i> | IDFGLAAKLDPKQTVKVTGTAEFAAPEIASGNPVGYFTDMWSVGVLSYI  |

*C. elegans* LLSGLSPFGGENDEETLRNVKSCDWNMDDSAFSGISEDGKDFIRKLLAD  
*C. remanei* LLSGLSPFGGENDDTLRNVK-----  
*C. briggsae* LLSGLSPFGGENDDTLRNVK-----  
*C. tropicalis* LLSGLSPFGGENDEETLRNVKSCDWNMDDSAFSSISEDGKDFIRKLLAD  
*C. sinica* LLSGLSPFGGENDDTLRNVKSCDWNMDDSAFASISEDGKDFIRKLLAD  
*C. japonica* LLSGLSPFGGENDEETLRNVKSCDWNMDDSAFSSISDDGKDFIRKLLAD  
*H. bacteriophora* LLSGLSPFGGENDAETLKNVKNCDWNMDDPAFNSISEEGKDFIQKLLSD  
*S. vulgaris* LLSGLSPFGGENDEETLKNVKKCDWNMDDPLFNQISENAKDFIRKLLILE  
*A. duodenale* LLSGLSPFGGENDEETLKNVKKCDWNMDDPLFNTVSDNAKDFIRKLLLE  
*O. dentatum* LLSGLSPFGGENDEETLKNVKKCDWNMDDSAFSGVSENARDFIRKLLVLE  
*H. polygyrus* LVSGLSPFAGENDEETLKNVKKCDWNMDDPVFNQISDNGKDFIRKLLVAE  
*A. ceylanicum* LLSGLSPFGGESDEETLKNVKKCDWNMDDSLFNQVSDNAKDFIRKLLILE  
*A. caninum* LLSGLSPFGGENDEETLKNVKKCDWNMDDPLFNQVSDNARDFIRKLLILE  
*T. circumcincta* LLSGLSPFAGENDEETLKNVKKCDWNMDDPIFNQVSENARDFIRKLLVAE  
*T. canis* LLSGLSPFGGETDEETLKNVKNCDWNMDDPCFSKVSDDAKDFIKKLLVLD  
*H. contortus* LLSGLSPFAGENDEETLKNVKKCDWNMDDPIFSQVSDNAKDFVRKLLVAE  
*H. placei* LLSGLSPFAGENDEETLKNVKKCDWNMDDPIFSQVSDNAKDFVRKLLVAE  
*A. cantonensis* LLSGLSPFGGENDEETLRNVKKNCDWNMDDPMFSKVSNAKDFIRKLLVAE  
*S. feltiae* LLSGLSPFGGENDEETLKNVKACDWNMDDPSFSSISDNAKDFIRKLLSAE  
*S. glaseri* LLSGLSPFGGENDEETLKNVKACDWNMDDPAFNSISDNAKDFIRKLLHAE  
*S. scapterisci* LLSGLSPFGGENDEETLKNVKNCDWNMDDPAFSSISDNAKDFIRKLLSAD  
*S. monticolum* LLSGLSPFGGENDEETLKNVKACDWNMDDPAFSSISDNAKDFIRKLLSGE  
*S. muris* LLSGLSPFGGESDEETLRNVKKNCDWNMDDPCFSKISDDAKDFIKKLLLD  
*A. simplex* LLSGLSPFGGETDEETLKNVKKCDWNMDDPCFSKVSDDAKDFIKKLLVLD  
*S. carpocapsae* LLSGLSPFGGENDEETLKNVKNCDWNMDDPSFSSISDNAKDFIRKLLSAE  
*A. suum* LLSGLSPFGGETDEETLRNVKKNCDWSMDDPCFAKVSDEAKDFIKKLLVLD  
*A. lumbricoides* LLSGLSPFGGETDEETLRNVKKNCDWSMDDPCFAKVSDEAKDFIKKLLVLD  
*D. viviparus* LLSGLSPFGGTNDEETLKNVKNCDWNMDNPIFNQISDSAKDFIQKLLISE  
*P. redivivus* LLSGLSPFGGENDEETLKNVKACDWNMDDSAFESISDNAKSFIKSLLNLD  
*T. callipaeda* LVSGLSPFGGETDEETLRNVKKNCDWNMDDPCFATISQDGKDFIRKLLILE  
*A. viteae* LLSGLSPFGGETDEETLRNVKKNCDWNMDDPSFANISQDGKDFIKKLLMLD  
*O. ochengi* LLSGLSPFGGETDEETLRNVKKNCDWNMDDSSFANISQDGKDFITKLLMLD  
*O. volvulus* LLSGLSPFGGETDEETLRNVKKNCDWNMDDSSFANISQDGKDFIKKLLMLD  
*P. trichosuri* LLSGLSPFGGETDEETLKNVRNCDWNMDDSSFDGISNEAKDFIKRLLINE  
*L. sigmodontis* LLSGLSPFGGETDEETIKNVKKNCDWNMDDPIFANISLDGKDFVKKLLTLD  
*O. flexuosa* LLSGLSPFGGETDEETLRNVKKNCDWNMDDPSFANISQDGKDFIKKLLMLD  
*W. bancrofti* LLSGLSPFGGETDDETLRNVKKNCDWNMDDPSFASISQDAKDFIKKILMLD  
*B. malayi* LLSGLSPFGGETDDETLRNVKKNCDWNMDDPSFASISQDAKDFIKKILMLD  
*S. ratti* LLSGLSPFGGETDEETLKNVKNCDWNMDDSAFNGISDEGKDFIKRLLINE  
*S. venezuelensis* LLSGLSPFGGETDEETLKNVRNCDWNIDDSAFSGISDEAKDFIRLLIAE  
*S. stercoralis* LLSGLSPFGGETDEETLKNVKNCDWNMDDSAFNGISDDGKDFIKRLLISE  
*B. pahangi* LLSGLSPFGGETDDETLRNVKKNCDWNMDDPSFASISQDAKDFIKKILMLD  
*L. loa* LLSGLSPFGGETDEETLRNVKKNCDWNMDDPSFANISQEGKDFIMKLLMLD  
*D. immitis* LLSGLSPFGGETDEETLRNVKKNCDWNMDDPSFTNISQDGKDFIKKLLILD  
*S. papillosus* LLSGLSPFGGETDEETLKNVRNCDWNIDDSAFSGISDEAKDFIRLLIAE  
*D. medinensis* LLSGLSPFGGITDDETLKNVRNCDWNMDDPCFDNISQNAKDFIQKLLILN  
*Rhabditophanes (sp.)* LLSGLSPFGGESDEETLKNVKNCDWSIDDAAFEGISENAKDFIKKLLVLE

|                             |                   |
|-----------------------------|-------------------|
| <i>C.elegans</i>            | PNTRMTIHQALEHPWL  |
| <i>C.remanei</i>            | -----             |
| <i>C.briggsae</i>           | -----             |
| <i>C.tropicalis</i>         | PNTRMTIHQALEHPWL  |
| <i>C.sinica</i>             | PNTRMTIHQALEHPWL  |
| <i>C.japonica</i>           | PNSRMTVHQALEHPWL  |
| <i>H.bacteriophora</i>      | TSSRMTIHQALEHPWL  |
| <i>S.vulgaris</i>           | P-----            |
| <i>A.duodenale</i>          | PDKRMTIHEALAHWPWL |
| <i>O.dentatum</i>           | PDKRMTVHEALAHWPWL |
| <i>H.polygyrus</i>          | PGGRMTVHEALNHPWL  |
| <i>A.ceylanicum</i>         | PDKRMTVHEALAHWPWL |
| <i>A.caninum</i>            | PDKRMTIHEALAHWPWL |
| <i>T.circumcincta</i>       | PSKRMTIHEALNHPWL  |
| <i>T.canis</i>              | PASRMTVHEALEHPWL  |
| <i>H.contortus</i>          | PGGRMTIHEALNHPWL  |
| <i>H.placei</i>             | PGSRMTIHEALNHPWL  |
| <i>A.cantonensis</i>        | PEKRITIHEALAHWPWL |
| <i>S.feltiae</i>            | PTERMNIHDALDHPWL  |
| <i>S.glaseri</i>            | PSSRMNIHEALDHPWL  |
| <i>S.scapterisci</i>        | PTERMNIHEAMDHPWL  |
| <i>S.monticolum</i>         | PTERMNIHEALDHPWL  |
| <i>S.muris</i>              | PSSRMTVHQALEHPWL  |
| <i>A.simplex</i>            | PSSRMTIHEALEHPWL  |
| <i>S.carpocapsae</i>        | PTERINIHEALDHPWL  |
| <i>A.suum</i>               | PTSRMTVHEALEHPWL  |
| <i>A.lumbricoides</i>       | PTSRMTVHEALEHPWL  |
| <i>D.viviparus</i>          | PSKRMTVHETLSHPWL  |
| <i>P.redivivus</i>          | PKSRLTVHDALDHPWL  |
| <i>T.callipaeda</i>         | PKNRMSIHEALEHPWL  |
| <i>A.viteae</i>             | PKSRMTVHEALEHPWL  |
| <i>O.ochengi</i>            | PKSRMTVHEALEHPWL  |
| <i>O.volvulus</i>           | PKSRMTVHEALEHPWL  |
| <i>P.trichosuri</i>         | SDKRMTIHEALDHPW-  |
| <i>L.sigmodontis</i>        | PKSRMTVHEALEHPWI  |
| <i>O.flexuosa</i>           | PKSRMTVHEALEHPWL  |
| <i>W.bancrofti</i>          | PKSRMTVHEALEHPWL  |
| <i>B.malayi</i>             | PKSRMTVHEALEHPWL  |
| <i>S.ratti</i>              | PEKRMNIHEALDHPWL  |
| <i>S.venezuelensis</i>      | PEKRMNIYEALDHPW-  |
| <i>S.stercoralis</i>        | PEKRMNIHEAIDHPW-  |
| <i>B.pahangi</i>            | PKSRMTVHEALEHPWL  |
| <i>L.loa</i>                | PKSRMTVHEALEHPWL  |
| <i>D.immitis</i>            | PENRMTVHEALEHPWL  |
| <i>S.papillosus</i>         | PEKRMNIYEALDHPW-  |
| <i>D.medinensis</i>         | PGNRMNIHEALQHPWL  |
| <i>Rhabditophanes (sp.)</i> | SGSRMGIHDALDHPW-  |

**Figure S6. Sequence analysis suggests that twitchin kinase is likely to be an active protein kinase in most nematodes.**

Sequence alignment of the catalytic domain of twitchin kinase orthologs from 47 nematode species indicating conservation of 6 residues or motifs known to be crucial for protein kinase activity (highlighted or boxed in color). The roles or names of these motifs are indicated in the top row.

# Supplemental Fig. 7

< *unc-22* >

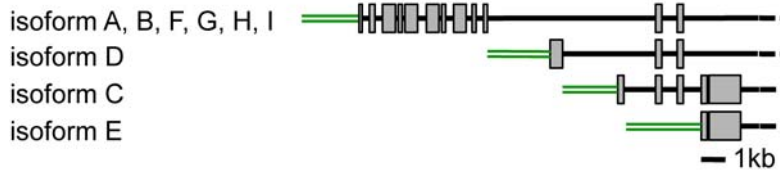

< isoform A, B, F, G, H, I >

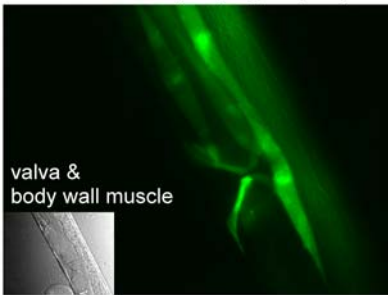

< isoform D >

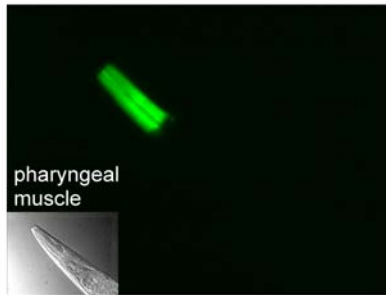

< isoform C >

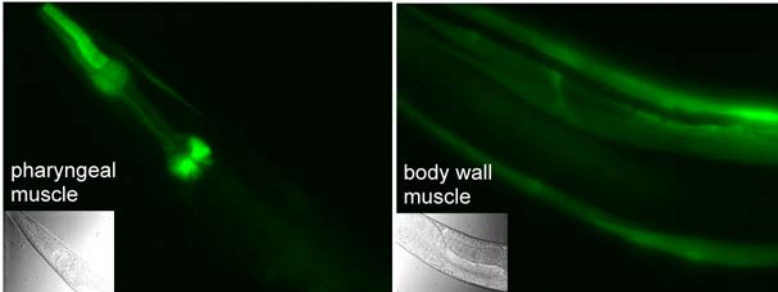

< isoform E >

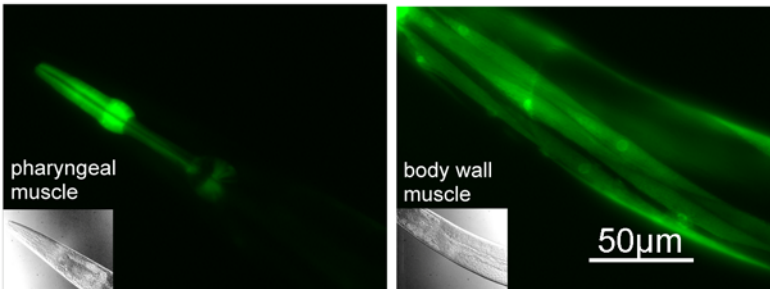

**Figure S7. *unc-22* are promoters expressed in body wall muscle, pharyngeal muscle and/or vulva muscle.**

As depicted on WormBase, *unc-22* has 9 isoforms that include the protein kinase domain.

To investigate their expression patterns in adults, we generated transgenic worms expressing VENUS driven by each upstream sequence of *unc-22*. As shown, isoforms (A, B, F, G, H, and I) share the same initiator codon, and this promoter reporter is expressed in body wall and vulva muscles. In contrast, the isoform D promoter reporter is only expressed in pharyngeal muscles. For isoforms C and D, promoter reporters are expressed in body wall and pharyngeal muscles.
